# Supplementary material for: “The Doctor Needs to Know”: Acceptability of Smartphone Location Tracking for Care Coordination
Source: PubMed Central journal article supplement (PMC5960037; doi:10.2196/mhealth.9726), 2018-05-04
Supplement: mhealth_v6i5e112_app1.pdf [file mhealth_v6i5e112_app1.pdf]

Multimedia Appendix 1: List of Themes and Codes from Analysis of Patient Focus Group Transcripts

| <b>Theme</b>                                                             | <b>Codes</b>                                           |
|--------------------------------------------------------------------------|--------------------------------------------------------|
| [A] Overall acceptability of app                                         | [A1] Yes/willing to use                                |
|                                                                          | [A2] No/unwilling to use                               |
| [B] Advantages of prompts                                                | [B9] General comments about advantages                 |
| [C] Disadvantages of prompts                                             | [C1] False alarms                                      |
|                                                                          | [C2] Draining battery                                  |
|                                                                          | [C3] Timing/number of prompts                          |
|                                                                          | [C4] Cell coverage in hospital                         |
|                                                                          | [C5] Unable to respond, incapacitated in hospital      |
| [D] Prompt design                                                        | [D1] Visual look                                       |
|                                                                          | [D2] Wording of prompts                                |
|                                                                          | [D3] Personalization of prompts (e.g. why at hospital) |
|                                                                          | [D4] Allow delayed response (e.g. snooze button)       |
|                                                                          | [D5] Prompt sounds/vibrations                          |
|                                                                          | [D6] Timing of prompts                                 |
| [E] Prompts for emergency department (ED) visits: willingness to respond | [E1] Yes/would respond to prompt                       |
|                                                                          | [E2] Depending on situation (e.g. how sick you are)    |
|                                                                          | [E3] No/undesirable                                    |
| [F] Optional features                                                    | [F1] Alerts to family/friends                          |
|                                                                          | [F2] Alerts to non-Erie providers                      |
|                                                                          | [F3] Medication reminders and/or other app functions   |
| [G] Privacy/location tracking concerns                                   | [G1] Yes, privacy concerns                             |
|                                                                          | [G2] No privacy concerns                               |
|                                                                          | [G3] Yes, concerns with data breach/hacking            |
|                                                                          | [G4] No concerns with data breach/hacking              |
| [X] Other                                                                | [X9] Other                                             |
